# Supplementary material for: Effects of Delayed-Release Olive Oil and Hydrolyzed Pine Nut Oil on Glucose Tolerance, Incretin Secretion and Appetite in Humans
Source: MDPI journal article supplement (doi:10.3390/nu13103407), 2021-09-27
Supplement: s1 [file s1]

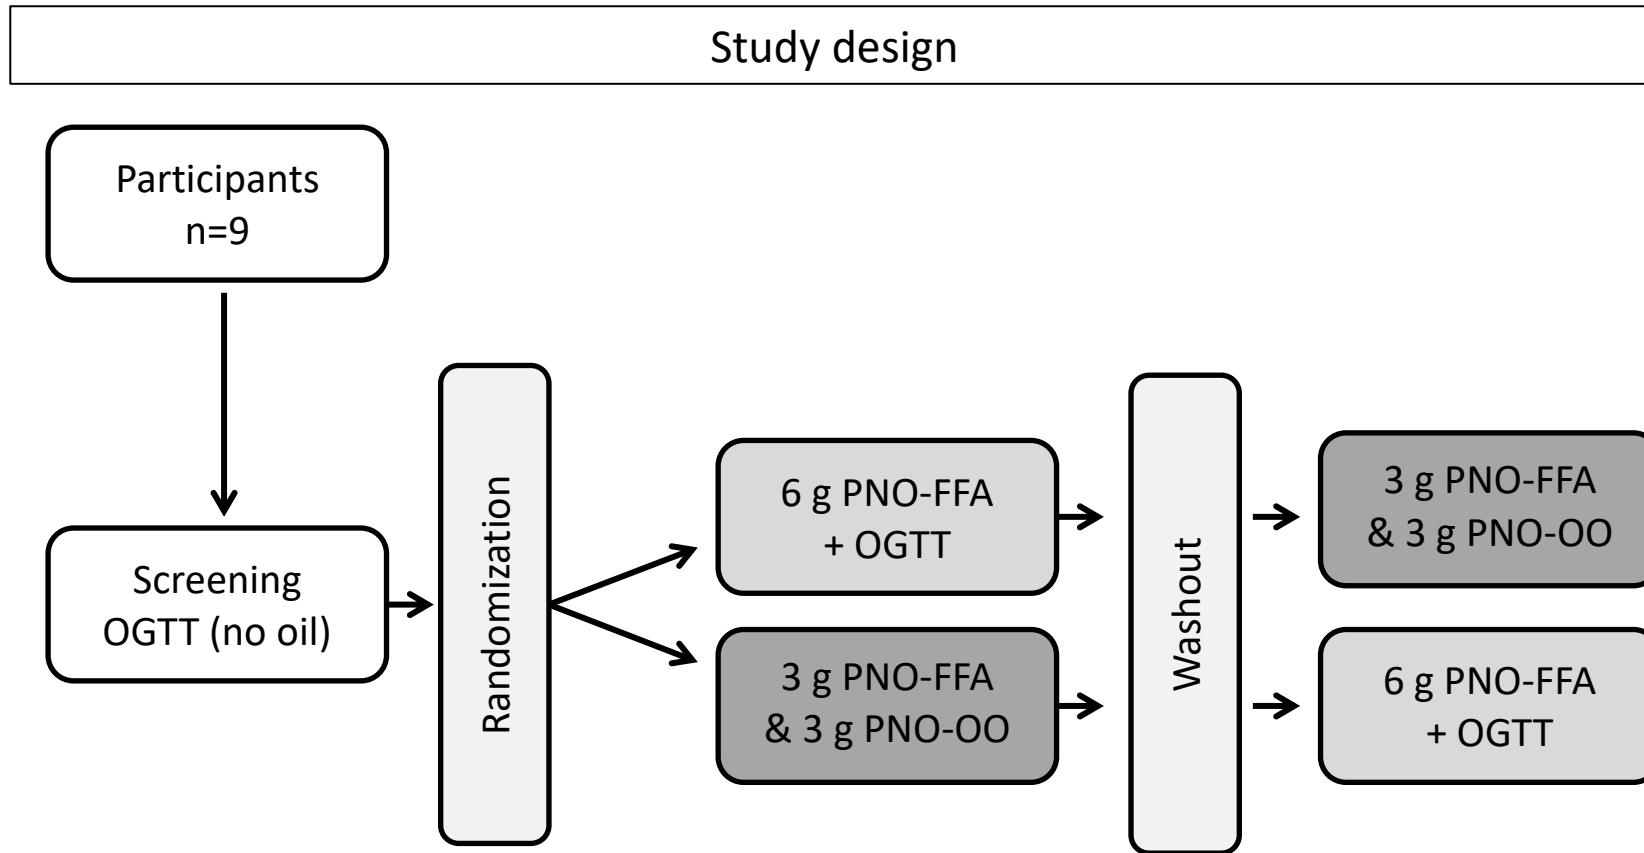

**Figure S1.** Study design

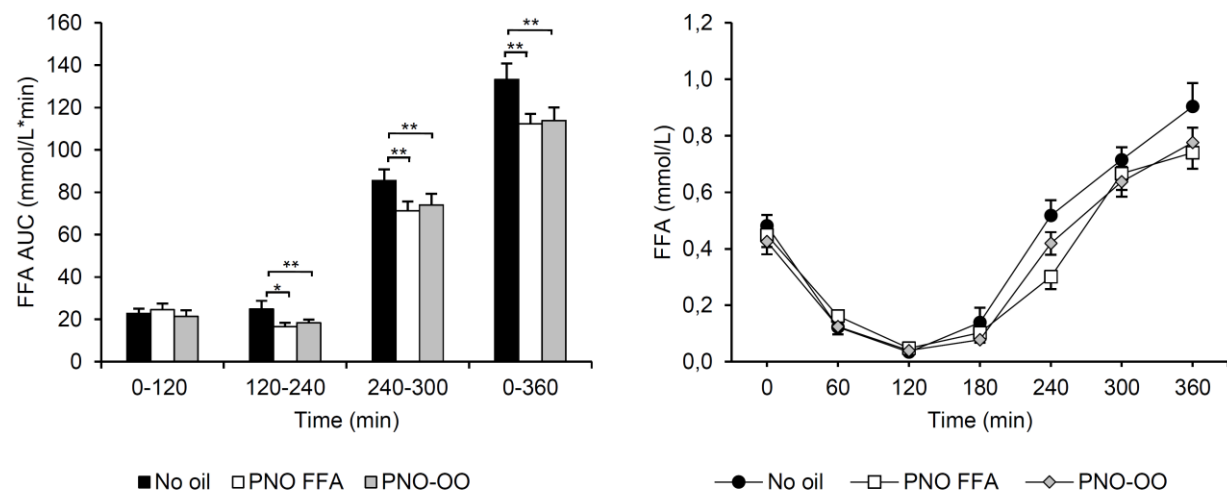

**Figure S2.** Free fatty acids (FFA) levels during a 6-hours OGTT and their corresponding area under the curve calculated for 0-120, 120-240, 240-360 and 0-360 min in response to glucose alone (no oil, black bars and black circles), 6 g hydrolyzed pine nut oil (PNO-FFA, white bars and white squares) or 3 g hydrolyzed pine nut oil and 3 g olive oil (PNO-OO, gray bars and gray diamonds). Data are mean  $\pm$  SEM. \* $p < 0.05$ , \*\* $p < 0.01$

**Table S1.** Delta values of gastrointestinal tolerability during the OGTT, and mean values at 8PM after the OGTT and at 8AM after the OGTT.

|                         | No oil      | PNO-FFA                 | PNO-OO      |
|-------------------------|-------------|-------------------------|-------------|
| <b>Flatulence</b>       |             |                         |             |
| Δ 0-360 min             | -15.4 ± 6.3 | 0.1 ± 4.6               | 2.1 ± 2.4*  |
| 8 PM evening after OGTT | 11.2 ± 3.2  | 11.4 ± 3.0 <sup>1</sup> | 12.2 ± 2.5  |
| 8 AM morning after OGTT | 11.9 ± 3.3  | 12.3 ± 2.3 <sup>1</sup> | 10.2 ± 3.50 |
| <b>Bloating</b>         |             |                         |             |
| Δ 0-360 min             | 0.2 ± 1.2   | 0.3 ± 1.1               | 1.4 ± 2.70  |
| 8 PM evening after OGTT | 11.2 ± 3.2  | 2.6 ± 1.3 <sup>1</sup>  | 3.0 ± 1.2   |
| 8 AM morning after OGTT | 5.7 ± 2.5   | 1.1 ± 0.4 <sup>1</sup>  | 2.8 ± 1.5   |
| <b>Nausea/vomiting</b>  |             |                         |             |
| Δ 0-360 min             | 5.0 ± 3.8   | -1.7 ± 5.9              | -1.3 ± 1.2  |
| 8 PM evening after OGTT | 4.6 ± 2.5   | 5.8 ± 2.9 <sup>1</sup>  | 4.4 ± 3.3   |
| 8 AM morning after OGTT | 3.2 ± 2.0   | 1.0 ± 0.3 <sup>1</sup>  | 1.4 ± 0.4   |
| <b>Diarrhea</b>         |             |                         |             |
| Δ 0-360 min             | 0 ± 0.4     | 10.3 ± 8.7              | 0.1 ± 0.2   |
| 8 PM evening after OGTT | 7.2 ± 6.6   | 14.3 ± 7.1 <sup>1</sup> | 1.3 ± 0.5   |
| 8 AM morning after OGTT | 0.8 ± 0.4   | 2.3 ± 1.3 <sup>1</sup>  | 1.0 ± 0.3   |
| <b>Constipation</b>     |             |                         |             |
| Δ 0-360 min             | -2.7 ± 2.0  | 0.7 ± 0.7               | 0 ± 0.50    |
| 8 PM evening after OGTT | 0.8 ± 0.3   | 6.0 ± 4.8 <sup>1</sup>  | 2.6 ± 1.5   |
| 8 AM morning after OGTT | 10.9 ± 10.1 | 4.6 ± 3.1 <sup>1</sup>  | 3.8 ± 2.4   |
| <b>Abdominal pain</b>   |             |                         |             |
| Δ 0-360 min             | 2.0 ± 2.0   | 0.6 ± 2.1               | -0.1 ± 0.8  |
| 8 PM evening after OGTT | 1.1 ± 0.5   | 3.8 ± 2.5 <sup>1</sup>  | 1.6 ± 0.5   |
| 8 AM morning after OGTT | 6.2 ± 5.2   | 0.9 ± 0.5 <sup>1</sup>  | 1.2 ± 0.6   |

Gastrointestinal symptoms measured by use of visual analog scales (VASs, mm). Values are mean ± SEM.

Superscript numerals indicate number of missing values. \*p<0.05 versus no oil.
